# Supplementary material for: Reconstruction of clone- and haplotype-specific cancer genome karyotypes from bulk tumor samples
Source: HighWire-hosted journal article supplement (doi:10.1101/gr.256701.119), 2020-09-01
Supplement: Supplemental_Table_S3.xlsx [file Supplemental_Table_S3.xlsx]

## Sheet: RCK_CN_change_HATCHet
RCK run with P=0.9
			combined length of segments with changed copy numbers
	sample	clone	All changes	Amplification change	Neutral change	Loss change
Heterogeneous	A10c	1	327368996	148971154	65604182	24538623
		2	895232506	345550059	131710150	275901308
	A12c	1	115136934	126323540	105850303	105972708
		2	338196551	49082689	13811823	43665590
	A12d	1	343386493	96903927	118091700	116258741
		2	169391543	55864997	51242956	46498367
	A17d	1	342547892	145181470	104275934	32546546
		2	179644516	46183136	89864633	32556687
	A31a	1	188855492	1407286	76673847	58815313
		2	482613055	12069858	120908628	38853228
	A31d	1	179895505	1392025	107132626	8726249
		2	371042144	5812745	223666873	9273818
	A31e	1	361430842	51045400	196083512	13544181
		2	151016475	6947646	107007065	8848686
	A31f	1	345498861	5901584	223496507	10189322
		2	152809670	1490788	107021057	8808020
	A32e	1	539545958	90636995	237794507	20585116
		2	268202955	57740749	72009386	11643940
	A34c	1	189368973	74068278	42627995	65012349
		2	318214230	167927193	67312141	73090924
Homogeneous	A21g	1	206055128	78342031	22323486	40218885
	A21h	1	220089729	74448118	36639050	41673153
	A24c	1	294548458	59203206	120020770	103099954
	A24d	1	318663815	83816465	121015064	92617944
	A24e	1	296434005	63837679	118795673	101988027
	A34a	1	314049849	112547374	101449182	95331899
	A34d	1	211509067	78540961	34398903	89333931
Notation
All changes	combined diploid length of all segments that had a copy number change by RCK from the input
Amplification change	combined diploid length of all segments that had CN > 1 in the input, but RCK changed said CN to non-amplified (i.e., <2) value
Neutral change	combined diploid length of all segments that had CN = 1 in the input, but RCK changed said CN to non-neutral (i.e., != 1) value
Loss change	combined diploid length of all segments that had CN = 0 in the input, but RCK changed said CN to non-loss (i.e., > 0) value
All states change	sum of Amplification, Neutral, and Loss change values
Table S3: Copy number changes in karyotypes reconstructed by RCK with HATCHet segment copy number input.
