# Supplementary material for: Reconstruction of clone- and haplotype-specific cancer genome karyotypes from bulk tumor samples
Source: HighWire-hosted journal article supplement (doi:10.1101/gr.256701.119), 2020-09-01
Supplement: Supplemental_Table_S4.xlsx [file Supplemental_Table_S4.xlsx]

## Sheet: RCK_CN_change_Battenberg
RCK run with P=0.9
			combined length of segments with changed copy numbers
	sample	clone	All changes	Amplification change	Neutral change	Loss change
Heterogeneous	A10c	1	293927325	84384957	124316443	50745032
		2	377839793	187999627	90732406	17425489
	A12c	1	201816325	47059903	41956400	41476373
		2	181417986	47419253	19522021	43674018
	A12d	1	76576145	16802363	11836501	37866849
		2	116700990	35334159	21622474	35574503
	A17d	1	171442805	51237727	68724562	27593332
		2	213841926	96932827	87742695	19217800
	A31a	1	103767958	7095970	17483218	47071576
		2	72504877	2798226	19708064	17124073
	A31d	1	260879684	72747927	77047039	79071465
		2	155558505	72995940	43802001	6096989
	A31e	1	102333270	33191517	21418041	24832732
		2	68879175	9818853	28199935	4384900
	A31f	1	123711745	13673134	31666486	6093944
		2	31564000	4440522	12075083	3409297
	A32e	1	315707217	71878955	27507636	59822001
		2	303570384	75054848	66714294	62611820
	A34c	1	193848234	83042386	55794869	34307314
		2	238944717	51629113	136865843	34010760
Homogeneous	A21g	1	131260781	21845804	33898199	48310779
	A21h	1	133588796	24029695	26392520	46312999
	A24c	1	234834702	14925706	107603647	104016634
	A24d	1	297638013	67916943	101310913	110098042
	A24e	1	242981618	52002410	88071045	100329478
	A34a	1	245868089	49028603	103157526	65433644
	A34d	1	145051755	56072998	39170689	41792896
Notation
All changes	combined diploid length of all segments that had a copy number change by RCK from the input
Amplification change	combined diploid length of all segments that had CN > 1 in the input, but RCK changed said CN to non-amplified (i.e., <2) value
Neutral change	combined diploid length of all segments that had CN = 1 in the input, but RCK changed said CN to non-neutral (i.e., != 1) value
Loss change	combined diploid length of all segments that had CN = 0 in the input, but RCK changed said CN to non-loss (i.e., > 0) value
All states change	sum of Amplification, Neutral, and Loss change values
Table S4: Copy number changes in karyotypes reconstructed by RCK with Battenberg segment copy number input.
